# Supplementary material for: Identification of Sources and Transformations of Nitrate in the Intense Human Activity Region of North China Using a Multi-Isotope and Bayesian Model
Source: MDPI journal article supplement (doi:10.3390/ijerph18168642), 2021-08-16
Supplement: s1 [file s1]

Supplementary figure caption  
Supplementary figure 1 Hydrogeological cross-section of Ye River basin  
Supplementary figure 2 Variations of the concentration and isotopic compositions for nitrate in the Ye River.

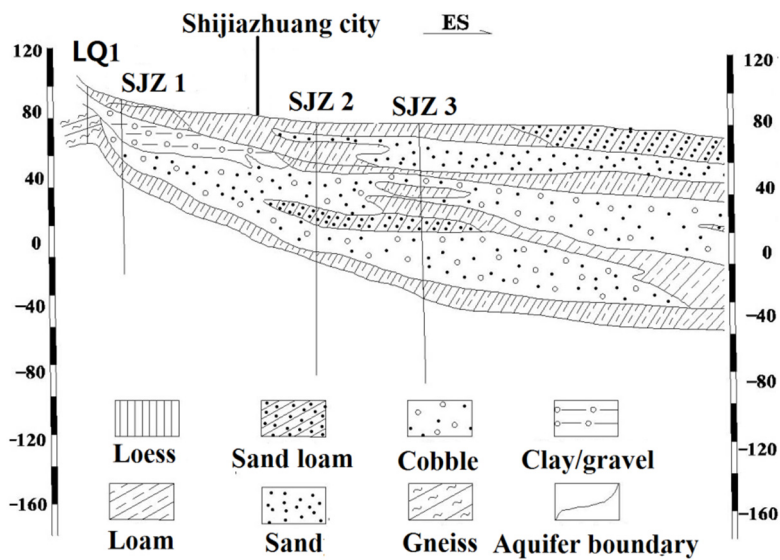

Supplementary Figure S1 Hydrogeological cross-section of Ye River basin

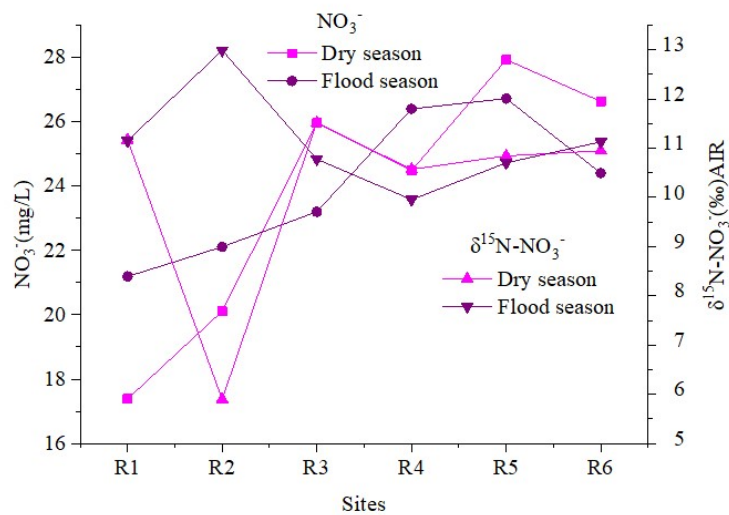

Supplementary Figure S2 Variations of the concentration and isotopic compositions for nitrate in the Ye River.
